Treatment

## Sleep disorders in patients with overweight and acute and exacerbated chronic heart failure

Kalidjiev PK.; Kinova E.; Somleva D.; Goudev A.

University Hospital Tsaritsa Yoanna, Sofia, Bulgaria

**Funding Acknowledgements:** Type of funding sources: Public Institution(s). Main funding source(s): Medical University - Sofia University Hospital "Tsaritsa Yoanna – ISUL"

**Background:** Often accompanying comorbidity in patients with heart failure and overweight is sleep disorders. Detection and treatment of sleep apnea will be helpful in these patients.

**Purpose:** To determine the phenotypic characteristics of sleep apnea in these patients. To determine whether there is a link between forms of sleep apnea and type of heart failure.

**Methods:** Hospitalized 46 patients with acute and exacerbate heart failure. Measuring of NT proBNP. Sleep apnea screening with Apnea-Link™. Echocardiographic assessment of left ventricular ejection fraction (LVEF) and the E/e' ratio. Statistical methods to compare independent samples and correlation analysis for linear dependence.

**Results:** Of the 46 overweight patients with acute and exacerbated chronic heart failure, sleep apnea was diagnosed in 36 patients (78.2%). Of these, 83.3% (n = 30) have obstructive sleep apnea (OSA) and 16.7% (n = 6) have central sleep apnea (CSA). There was a statistically significant difference in LVEF for the group with CSA (n = 6) vs group with OSA (n = 30) ( $41.67 \pm 13.88$  vs.  $50.57 \pm 8.16$ ,  $p = 0.038$ ). For diastolic function didn't reach statistical significance for E/e' ratio ( $20.33 \pm 5.00$  vs.  $17.06 \pm 4.02$ ,  $p = 0.089$ ). Regarding NTproBNP, there is no significant difference between the groups with OSA and those with CSA ( $2978.5 \pm 2664.1$  vs.  $2063.36 \pm 1877.27$  pg/ml,  $p = 0.316$ ). There is a moderate negative correlation with LVEF and number of central sleep apnea events ( $r = -0.334$ ,  $p = 0.047$ ).

**Conclusions:** With greater frequency occurs obstructive sleep apnea. Left ventricular systolic function is lower in patients with central sleep apnea. There is a reverse correlation between ejection fraction and number of central apnea.
